# Supplementary material for: Cucurbitacin B, Purified and Characterized From the Rhizome of Corallocarpus epigaeus Exhibits Anti-Melanoma Potential
Source: PubMed Central journal article supplement (PMC9213886; doi:10.3389/fonc.2022.903832), 2022-06-08
Supplement: DataSheet_1.pdf [file DataSheet_1.pdf]

## Supplementary Materials

### Supplementary Figures.

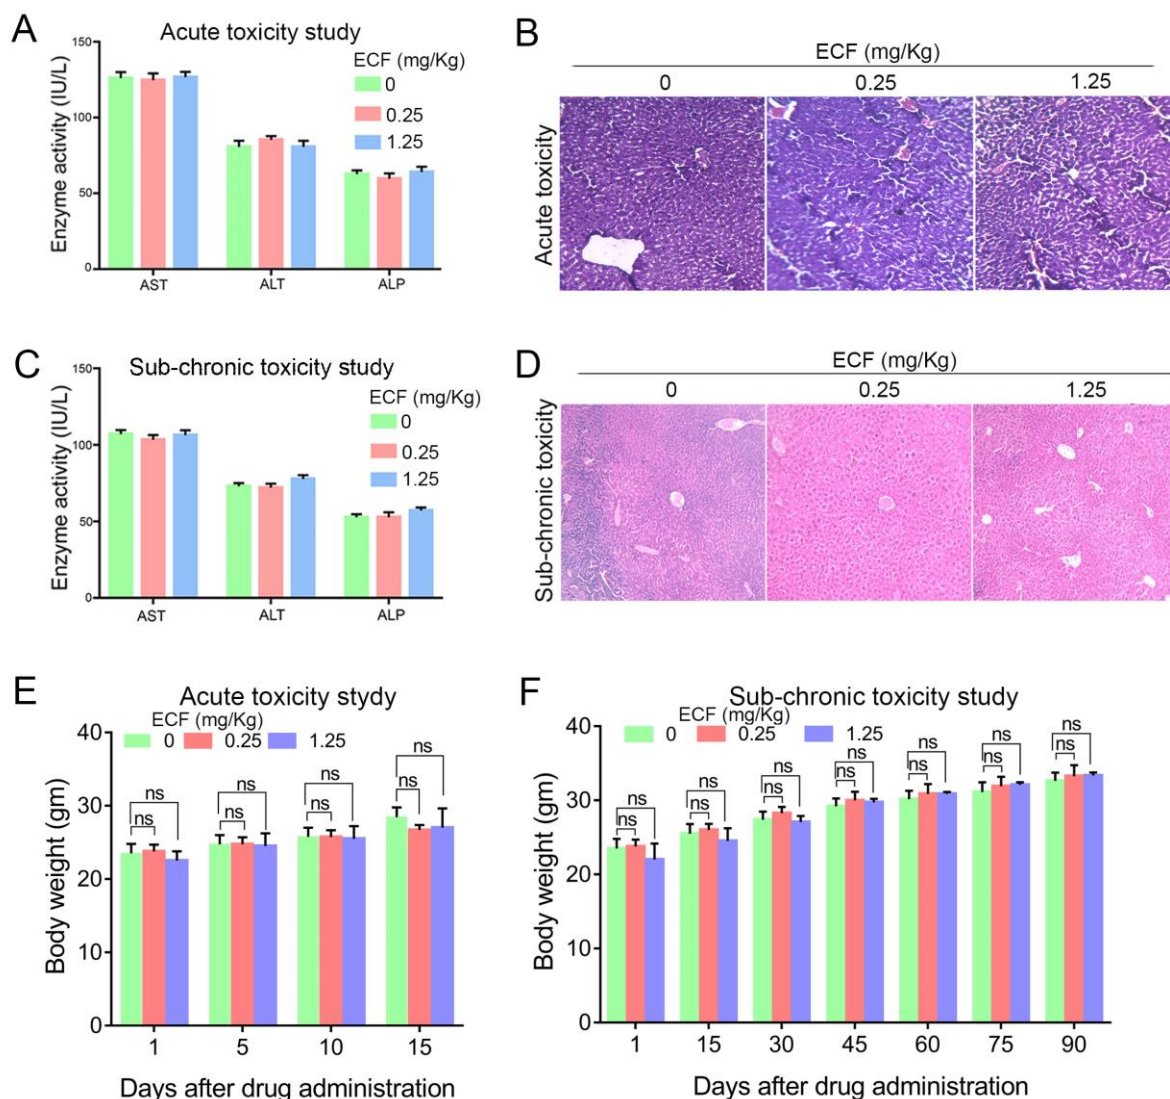

**Supplementary Figure 1. Pharmacological safety of ECF, (A-D) Toxicity analysis upon ECF treatment *in vivo*. Graphical representation of AST, ALT, and ALP activities in response to ECF treatment. H&E stained liver tissues of mice treated with ECF. (E) Representation of body weight (5 days intervals) of animals of the acute toxicity study. (F) Representation of body weight (14 days interval) of animals of the sub-chronic toxicity study.**

**A**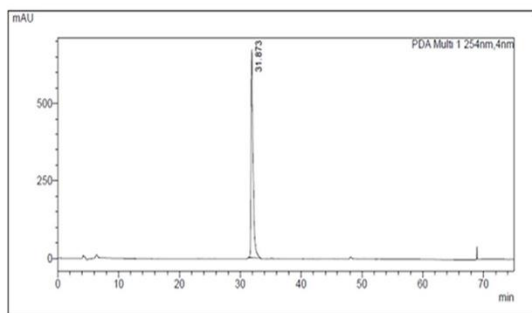**B**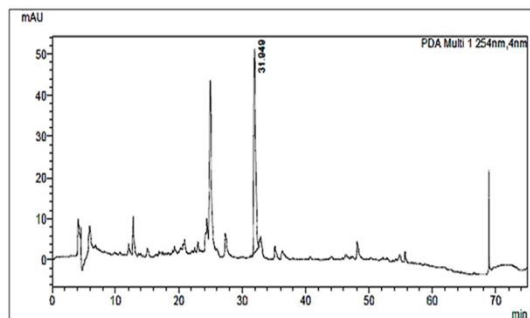

**Supplementary Figure 2. UHPLC chromatograms of cucurbitacin B and its presence in ECF fraction, (A-B)** ECF fraction (3 mg/ml) and the isolated pure compound (2 mg/ml) were dissolved in acetonitrile:water (1:1) and filtered through a 0.2  $\mu\text{m}$  nylon filter. The sample injection volume was 20  $\mu\text{L}$ , and the C18 column temperature was 35  $^{\circ}\text{C}$ . The mobile phase system consists of water:acetic acid (100:1) (A) and acetonitrile (B). A step gradient program was used for this analysis as follows: 0% B at 0 min to 40% B at 20 min, 40 to 50% at 30 min, 50 to 60% at 40 min, 60 to 80% at 50 min, 80 to 100% at 60 min, then maintaining at 100% B from 60 to 65 min at a flow rate of 1 ml/min, monitored at 254 nm.

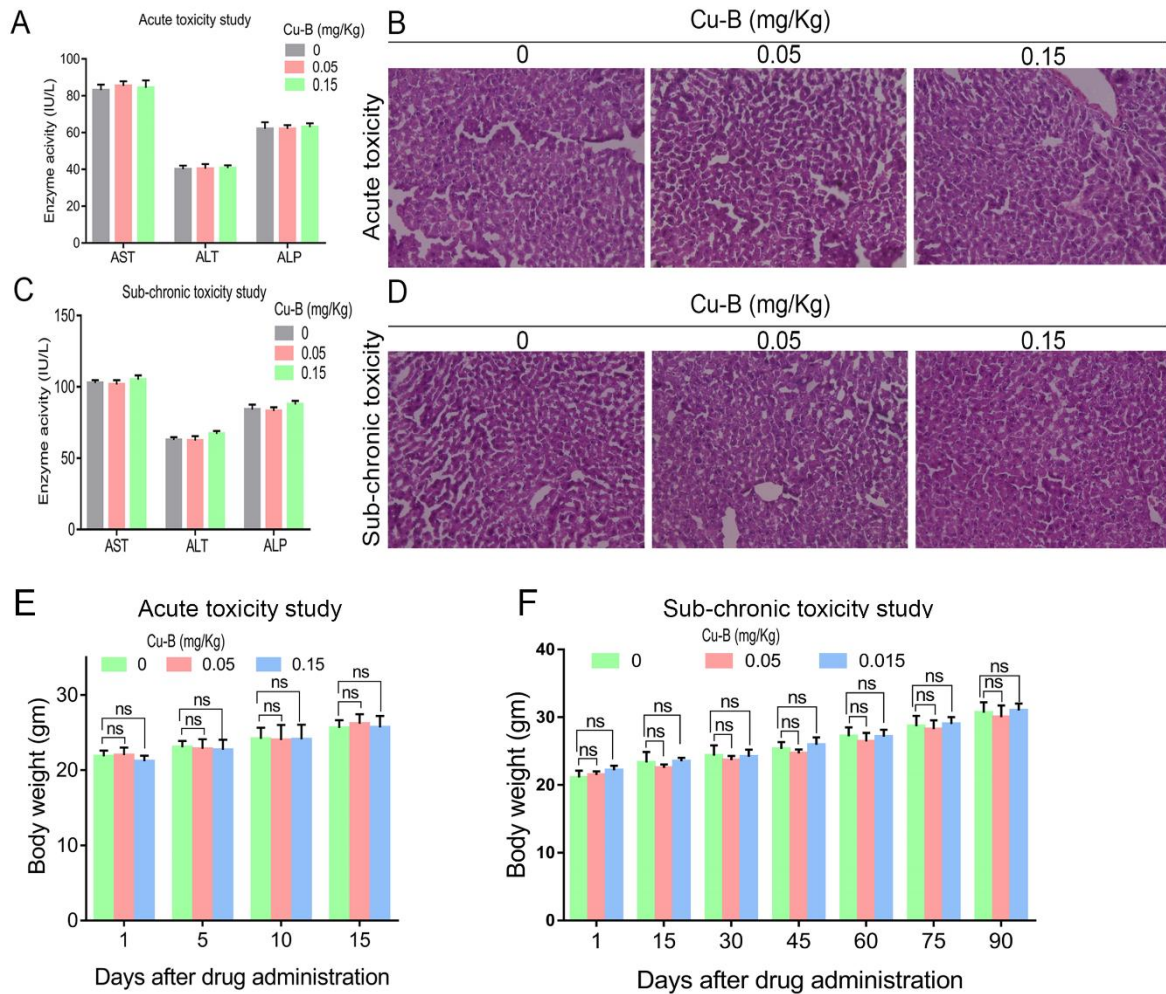

**Supplementary Figure 3. Pharmacological safety of Cu-B, (A-D)** Acute and sub-chronic toxicity analysis upon Cu-B treatment in *Swiss albino* mice. Graphical representation of AST, ALT, and ALP activities in response to Cu-B treatment. H&E stained liver tissues of mice treated with Cu-B. **(E)** Representation of body weight (5 days intervals) of animals of the acute toxicity study. **(F)** Representation of body weight (14 days interval) of animals of the sub-chronic toxicity study

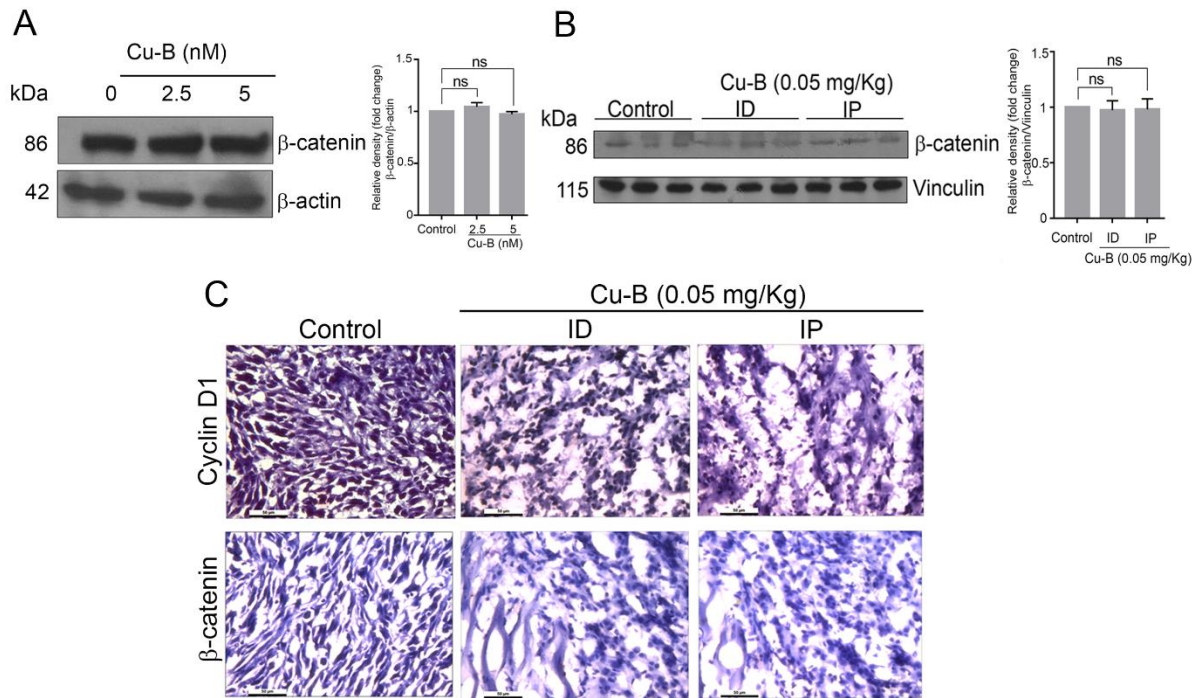

**Supplementary Figure 4. The effect of Cu-B on the key survival signals in melanoma,** (A) Cu-B treatment unalters  $\beta$ -catenin levels in A375 cells (B) Cu-B does not change  $\beta$ -catenin levels *in vivo* as evidenced in the tumor lysates (C) IHC analysis on the expression of Cyclin D1 and  $\beta$ -catenin in tumor tissues of mice groups. Data are representative of three independent experiments (Mean $\pm$ SEM) and P-values are calculated using one-way ANOVA. ns  $\geq$  0.05.

**Supplementary Table**

| Carbon No. | <sup>1</sup> H (ppm)                                       | <sup>13</sup> C (ppm) |
|------------|------------------------------------------------------------|-----------------------|
| 1          | 2.30, 1.24                                                 | 36.01                 |
| 2          | 4.36                                                       | 71.65                 |
| 3          | -                                                          | 213.08                |
| 4          | -                                                          | 50.25                 |
| 5          | -                                                          | 140.36                |
| 6          | 5.7 (t, <i>J</i> = 3.5 Hz, 1H)                             | 120.46                |
| 7          | 1.90 (d, <i>J</i> = 7 Hz), 2.42 (d, <i>J</i> = 7 Hz)       | 23.87                 |
| 8          | 1.98                                                       | 42.37                 |
| 9          | -                                                          | 48.45                 |
| 10         | 2.67                                                       | 33.73                 |
| 11         | -                                                          | 212.19                |
| 12         | 3.17 (d, <i>J</i> = 14.5 Hz), 2.62 (d, <i>J</i> = 14.5 Hz) | 48.66                 |
| 13         | -                                                          | 50.69                 |
| 14         | -                                                          | 48.11                 |
| 15         | 1.89, 1.47                                                 | 45.32                 |
| 16         | 4.36                                                       | 71.3                  |
| 17         | 2.5                                                        | 58.2                  |
| 18         | 0.91 (s, 3H)                                               | 19.86                 |
| 19         | 1.01 (s, 3H)                                               | 20.06                 |
| 20         | -                                                          | 78.24                 |
| 21         | 1.35 (s, 3H)                                               | 23.93                 |
| 22         | -                                                          | 202.5                 |
| 23         | 6.39 (d, <i>J</i> = 16.5 Hz)                               | 120.29                |
| 24         | 7.0 (d, <i>J</i> = 16.0 Hz)                                | 152.03                |
| 25         | -                                                          | 79.34                 |
| 26         | 1.50 (s, 3H)                                               | 26.46                 |
| 27         | 1.57 (s, 3H)                                               | 25.91                 |
| 28         | 1.24 (s, 3H)                                               | 29.37                 |
| 29         | 1.28 (s, 3H)                                               | 21.26                 |
| 30         | 1.3 (s, 3H)                                                | 18.91                 |
| 31         | -                                                          | 170.32                |
| 32         | 1.94 (s, 3H)                                               | 21.95                 |

**Supplementary Table 1.** <sup>1</sup>H and <sup>13</sup>C NMR of cucurbitacin B, in CDCl<sub>3</sub>, isolated from the ethyl acetate extract of *Corallocarpus epigaeus*.
